# Supplementary material
Source: HighWire-hosted journal article supplement (https://www.cmajopen.ca/highwire/filestream/81163/field_highwire_adjunct_files/1/2017-0080_original_submission.pdf)
Supplement: 2017-0080_original_submission.pdf [file 2017-0080_original_submission.pdf]

## How healthy is our healthcare workforce?

### A cross-sectional study on physical and mental health of Canadian healthcare workers

#### Corresponding author:

Matthias Hoben,<sup>1</sup> PhD, email: [mhoben@ualberta.ca](mailto:mhoben@ualberta.ca)

#### Co-authors

Jennifer A. Knopp-Sihota,<sup>2</sup> PhD

Maryam Nesari,<sup>1</sup> PhD

Stephanie A. Chamberlain,<sup>1</sup> MSc

Janet E. Squires,<sup>3,4</sup> PhD

Peter G. Norton,<sup>5</sup> MD

Greta G. Cummings,<sup>1</sup> PhD

Bonnie J. Stevens,<sup>6</sup> PhD

Carole A. Estabrooks,<sup>1</sup> PhD

#### Affiliations

<sup>1</sup>Faculty of Nursing, University of Alberta, Edmonton, AB, Canada

<sup>2</sup>Faculty of Health Disciplines, Athabasca University, Athabasca, AB, Canada

<sup>3</sup>School of Nursing, Faculty of Health Sciences, University of Ottawa, Ottawa, ON, Canada

<sup>4</sup>Clinical Epidemiology Program, Ottawa Hospital Research Institute, Ottawa, ON, Canada

<sup>5</sup>Department of Family Medicine, Cumming School of Medicine, University of Calgary, Calgary, AB, Canada

<sup>6</sup>Lawrence S. Bloomberg Faculty of Nursing, University of Toronto, Toronto, ON, Canada

#### Funding

The Translating Research in Elder Care (TREC) program was funded by a Canadian Institutes of Health Research (CIHR) grant-in-aid (MOP 53107). The Translating Research on Pain in Children (TROPIC) program was funded by a CIHR operating grant (CTP-79854). The funding agency had no role in the study design, data collection, data analysis, interpretation of the data, writing of the report, or decision to submit the article for publication.

#### Competing interests

The authors declare that they have no competing interests

**Abstract*****Background***

Quality of patient care is affected by poor health of healthcare workers. However, research and health data are scarce on healthcare workers. We compared the physical and mental health status of Canadian healthcare workers to Canadian population data. We also compared physical and mental health data for healthcare workers in pediatric acute care (PAC) and residential long term care (LTC).

***Methods***

Our cross-sectional study used the SF-8 Health Survey™ to examine the health status of healthcare workers. In PAC, we surveyed 63 physicians, 747 registered nurses (RNs), 155 allied healthcare providers, 49 nurse educators, and 22 managers. In LTC, we surveyed 169 RNs, 139 licensed practical nurses, 1506 care aides, 145 allied healthcare providers, and 69 managers. After standardizing our data for age and sex, we applied descriptive statistics and analyses of variance, adjusted for multiple testing.

***Results***

LTC workers and PAC RNs had poorer mental health than the Canadian population. Scores were lowest for LTC RNs (mean difference = -4.4, [95% confidence interval -6.6; -2.6]). Physicians in PAC (4.4, [1.3; 7.5]) and allied healthcare providers in LTC (3.2, [1.1; 5.3]) had better physical health than the general population. We also found important differences in physical and mental health scores for care provider groups within and between care settings.

***Interpretation***

We found that mental health is especially poor among LTC workers, who care for a highly vulnerable and medically complex population of older adults. We need strategies to improve physical and mental health of healthcare workers, including optimized work environments to improve quality of patient care.

## Introduction

As the world's population ages and grows, pressures on physicians and other skilled healthcare workers increase. Care provided in hospitals, and increasingly in non-acute settings such as residential long term care (LTC) facilities, becomes more complex. This generates higher demands both *for* and *on* healthcare workers. Demands are costly on healthcare workers' well-being (e.g., burnout, stress, job dissatisfaction, injury, abuse) and increase risk for both physical and mental health problems.<sup>1-5</sup> Resulting losses in workforce productivity (turnover, poor retention, absenteeism) are substantial costs to the healthcare system.<sup>6-8</sup> Simultaneously, care worker health is linked to safe, high quality patient care.<sup>9-13</sup> Understanding and measuring the health of the healthcare workforce is an initial and necessary aspect of delivering optimal patient care.<sup>14</sup>

We used the SF-8 Health Survey™, a short-form survey based on the longer SF-36, to evaluate and compare physical/mental health status of populations.<sup>15</sup> Most research reporting SF-8 survey data has focused on patient groups, measuring the impact of specific diseases on health status.<sup>16,17</sup> The SF-8 has also been used as a post-intervention outcome measure in specific patient populations (e.g., disease management,<sup>18</sup> exercise programs,<sup>19,20</sup> pharmacological<sup>21-23</sup> and clinical interventions<sup>24,25</sup>). Overall, however, little is known about the health status of our healthcare workers. This paper is the first step in a research program to better understand this gap and to develop and test improvement interventions.

Our primary objective was to describe the physical/mental health status of Canadian healthcare workers and compare it to the health status of the Canadian population.<sup>26</sup> Secondly, we compared differences in physical/mental health status among healthcare workers in pediatric acute care (PAC) and residential long term care (LTC) settings and among provider groups: physicians, registered nurses (RNs), licensed practical nurses (LPNs), care aides, allied healthcare providers, nurse educators, and managers. Although previous studies reported on similar American<sup>27</sup> and European<sup>28-31</sup> populations, we are the first to report comparisons of (a) various care worker groups in different settings and (b) comparisons of normative data for Canadian physicians and other healthcare workers. Normative data are essential to determine the health status of Canadian healthcare workers, to provide a foundation from which to detect

1  
2  
3 variance between sub-groups or between care workers and the general population, and for current  
4  
5 benchmarking.  
6

## 7 **Methods**

### 8 *Design*

9  
10 This was a cross-sectional analysis of survey data collected from care workers in two healthcare settings,  
11  
12 LTC and PAC. LTC data were collected in the Translating Research in Elder Care (TREC) program,<sup>32</sup> a  
13  
14 pan-Canadian, longitudinal program (2007–2022) of applied health services research. Data used in this  
15  
16 study were collected in TREC's second wave of surveys (07/2009–06/2010). PAC data were collected in  
17  
18 the Translating Research on Pain in Children (TROPIC) program (04/2006–03/2012).<sup>33,34</sup> Data used in  
19  
20 this study were collected between 04/2011 and 08/2011. Both research programs were funded by the  
21  
22 Canadian Institutes of Health Research (CIHR). We compared physical/mental health data collected in  
23  
24 TREC and TROPIC to Canadian normative SF-36 health data published in *CMAJ* in 2000.<sup>26</sup>  
25  
26  
27  
28

### 29 *Settings and samples*

30  
31 TREC's setting was a representative, randomly selected sample of 30 urban LTC facilities in Canada,  
32  
33 stratified by province (Alberta, Manitoba, Saskatchewan), size category (small: <80 beds, medium: 80–  
34  
35 120 beds, large: >120 beds), and owner-operator model (public not-for-profit, voluntary not-for-profit,  
36  
37 private for-profit).<sup>32</sup> We included survey data from 169 RNs, 139 LPNs, 1,506 care aides, 145 allied  
38  
39 healthcare providers, and 69 managers.  
40  
41

42 TROPIC's setting were the 15 Canadian tertiary-level pediatric hospitals at the time of the study, 8 of  
43  
44 which were eligible and agreed to participate in TROPIC.<sup>33,34</sup> We included survey data from 63  
45  
46 physicians, 747 RNs, 155 allied healthcare providers, 49 nurse educators, and 22 managers on 32  
47  
48 independent hospital care units.  
49  
50

### 51 *Measurements and outcomes*

52  
53 All healthcare workers completed online surveys, except care aides who completed computer assisted  
54  
55 structured personal interviews. We measured physical/mental health using the SF-8 Health Survey.<sup>15</sup> The  
56  
57 SF-8 is a shortened version of the SF-36, one of the most widely used health assessment tools.<sup>26</sup> As  
58  
59  
60

1  
2  
3 demonstrated by its developers<sup>35-38</sup> and confirmed by numerous studies,<sup>39-48</sup> the SF-36 is rigorously  
4 designed and psychometrically robust. The SF-8 measures 8 health domains, each rated using a 5- or 6-  
5 point Likert scale (Table 1).<sup>15</sup> We scored the SF-8 using the proprietary algorithm obtained with the  
6 scale.<sup>15</sup> We first assigned appropriate SF-36 scores, based on general US population data, to each  
7 corresponding SF-8 item response category (Table 1). We then generated two summary scores with a  
8 possible range of 0–100 (higher is better) for physical/mental health, by assigning regression-based  
9 physical/mental weights to each SF-8 domain score and adding a physical or mental health intercept  
10 constant.<sup>15</sup> With these standard scoring methods, SF-36 and SF-8 physical/mental component summary  
11 scores are comparable.<sup>15,49</sup>

12  
13  
14  
15  
16  
17  
18  
19  
20  
21  
22 [Insert Table 1 about here]

### 23 24 25 ***Statistical analysis***

26  
27 We used SAS 9.4 for all statistical analyses. We calculated frequency counts and proportions for  
28 categorical data and means and standard deviations for continuous data. To compare TREC, TROPIC,  
29 and Canadian normative data, we standardized our SF-8 data for age and sex, using the same method  
30 (simple direct standardization) and population (Statistics Canada data from 1999<sup>50</sup>) as a report on  
31 Canadian normative SF-36 data.<sup>26</sup> Specifically, we weighted total means based on underlying population  
32 characteristics. We calculated means, standard deviations, 95% confidence intervals (CIs), and  
33 floor/ceiling effects for each SF-8 health domain, and calculated physical/mental component summary  
34 scores by care provider group and healthcare setting. Floor and ceiling effects are defined as percent of  
35 participants selecting the response option reflecting the worst or best possible health status, respectively.  
36 We compared SF-8 physical/mental component summary scores of all care provider groups in both  
37 settings with corresponding SF-36 scores in the Canadian population.<sup>26</sup> We used analyses of variance  
38 (ANOVA) including pairwise post-hoc comparisons adjusted for multiple testing (Dunnnett method).<sup>51-53</sup>  
39 We compared SF-8 health domain scores and physical/mental component summary scores among  
40 healthcare workers within each healthcare setting using ANOVA and including pairwise post-hoc  
41 comparisons adjusted for multiple testing (Tukey-Kramer method).<sup>53-55</sup> Using the same statistical method,  
42  
43  
44  
45  
46  
47  
48  
49  
50  
51  
52  
53  
54  
55  
56  
57  
58  
59  
60

1  
2  
3 we also compared SF-8 health domain scores and summary scores between both settings for RNs, allied  
4 healthcare providers, and managers.  
5  
6

### 7 *Ethics approval*

8  
9 We obtained ethical approvals for TREC from the Universities of Alberta (B-051007), Calgary (E-  
10 21379), Saskatchewan (BEH08e165), and Manitoba (E2008:010). Operational approvals were obtained  
11 from all relevant healthcare organizations. Ethical approvals for TROPIC were obtained from the Health  
12 Research Ethics Boards of the appropriate Canadian universities (Pro00003308) and the participating  
13 hospital ethics boards (where applicable).  
14  
15  
16  
17  
18  
19

### 20 **Results**

21  
22 Our sample (Table 2) included a total of 3,064 healthcare workers (n=2,028 LTC; n=1,036 PAC). RNs  
23 and allied healthcare providers in PAC tended to be younger, better educated, and more experienced than  
24 their counterparts in LTC. Females were overrepresented in all provider groups (81%–96%), except for  
25 physicians (52%).  
26  
27  
28  
29  
30

31 [Insert Table 2 about here]  
32

### 33 *Comparison of SF-8 health domain scores within and between LTC and PAC*

34  
35 Table 3 shows the age- and sex-adjusted SF-8 sub-scores by care provider group and study setting. Floor  
36 effects were minimal (zero or almost zero) across SF-8 sub-scores and care provider groups, but ceiling  
37 effects varied substantially. Higher proportions of physicians and managers had maximum SF-8 health  
38 domain scores. RNs in LTC settings had significantly lower age- and sex-adjusted scores for general  
39 health, bodily pain, and mental health than RNs in PAC (Table 4). Allied healthcare providers in LTC had  
40 higher general health and vitality scores and lower mental health scores than their counterparts in PAC.  
41  
42  
43  
44  
45  
46  
47  
48  
49 LTC managers had lower general health scores than PAC managers.  
50

51 [Insert Table 3 about here]  
52

53 [Insert Table 4 about here]  
54  
55  
56  
57  
58  
59  
60

### ***Comparison of SF-8 summary scores between the Canadian population and healthcare workers***

Compared to the Canadian population (Table 5), physicians and allied healthcare providers had statistically significantly higher overall physical health scores and care aides had lower overall physical health scores. Except for LTC managers, all LTC provider groups had lower overall mental health scores than the Canadian population. The same was true for PAC RNs. Overall, physical and mental health varied substantially among provider groups within each setting (Figure 1).

[Insert Table 5 about here]

[Insert Figure 1 about here]

Legend Figure 1:

Note: 95% CI = 95% confidence interval, Allied = allied healthcare providers, LPNs = licensed practical nurses, LTC = long term care, MD = mean difference (mean for reference minus mean for comparison), PAC = pediatric acute care, RNs = registered nurses

\**P* values are based on Analyses of variance (ANOVA), including Tukey-Kramer adjusted pairwise post-hoc comparisons

### ***Comparison of SF-8 summary scores within and between LTC and PAC***

Allied healthcare providers and managers in LTC had higher physical health scores than care aides and RNs. Physical health scores in allied healthcare providers were also higher than in LPNs (Figure 1A). Mental health scores in LTC were higher in care aides and managers than in LPNs and RNs (Figure 1B). In PAC, physicians and managers had higher physical health scores than RNs and allied healthcare providers (Figure 1C), and physicians had higher mental health scores than allied healthcare providers, RNs, and nurse educators (Figure 1D). Figure 2 illustrates health differences between LTC and PAC settings. RNs' physical and mental health scores were lower in LTC than in PAC, and allied healthcare providers' physical health scores were higher in LTC than in PAC.

[Insert Figure 2 about here]

Legend Figure 2:

Note: 95% CI = 95% confidence interval, Allied = allied healthcare providers, MD = mean difference (mean for long term care minus mean for pediatric acute care), RNs = registered nurses

\**P* values are based on Analyses of variance (ANOVA), including Tukey-Kramer adjusted pairwise post-hoc comparisons

### **Interpretation**

This is the first study to provide normative (age-/sex-standardized) health data for physicians and other healthcare worker groups in Canada. To the best of our knowledge, this also is the first study to compare healthcare workers' physical/mental health across care settings, and to the physical/mental health of the Canadian general population.

### ***Explanation of findings and comparisons with other studies***

In PAC, physicians had higher health scores than RNs and allied healthcare providers. A Spanish study<sup>56</sup> found that physicians had more favourable physical health scores than RNs and other professionals. A Greek study<sup>28</sup> found that physicians and technical staff (mostly engineers) had scores 5–29 points higher than other participant groups in 6 of the 8 SF-36 health domains. An Italian study<sup>30</sup> found that physicians had scores 5–11 points higher than RNs in the social function, role–physical, and bodily pain domains. PAC physicians in our sample also had better physical health than the Canadian general population. Kay et al.<sup>57</sup> note that physicians have lower age- and sex-specific mortality rates than respective groups in the general population, supporting a common belief that physicians have better health than the general population. Conversely, evidence suggests that physicians have equally high or higher rates of physical and mental health problems than the general population.<sup>58,59</sup> However, these studies do not differentiate among physician work settings. We found no studies specifically comparing the health of physicians working in PAC with health of other healthcare workers in PAC, in any other setting, or in the general population.



1  
2  
3 Allied healthcare workers in LTC and managers in both settings had more favourable health scores  
4 than front-line staff providing 24-hour care (RNs, LPNs, care aides) in the respective settings. Allied  
5 healthcare workers in LTC also had better physical health than the Canadian population. We found only  
6 one study<sup>28</sup> comparing health scores of managers and RNs in acute care settings; manager scores were 3–  
7 14 points higher than RN scores in 6 of the 8 SF-36 health domains.  
8  
9

10  
11  
12  
13  
14 Front-line staff are at particularly high risk for health problems (best documented among nurses).<sup>60,61</sup>  
15 In the USA 18% of nurses have depressive disorders compared to 9% of the general population<sup>13</sup> Nurses  
16 are at greater risk of musculoskeletal injuries and blood-borne pathogens infections than other healthcare  
17 workers,<sup>61</sup> and at greater risk of breast cancer than other female healthcare workers. Nurses working in  
18 hospitals have a higher risk of tuberculosis.<sup>61</sup> In our study, nurses physical and mental health scores are  
19 lower than those of managers and physicians.  
20  
21  
22  
23  
24  
25  
26

27 Care aides are unregulated healthcare workers with little formal training.<sup>62-66</sup> About 90% are female,  
28 most are over 40 years old, and almost half speak English as a second language.<sup>62,65,66</sup> They often work  
29 multiple jobs and most earn less than half the national median annual income.<sup>66</sup> They manage high  
30 workloads with frequent interruptions,<sup>67</sup> often encounter verbal/physical aggressive behaviour from  
31 residents with dementia,<sup>62,66,68</sup> and are at particularly high risk for job dissatisfaction<sup>69</sup> and burnout.<sup>70</sup> All  
32 these factors affect their physical and mental health.<sup>4,71-73</sup> However, while their physical health scores in  
33 our study are lower than the ones of LTC allied healthcare providers and managers, they are not  
34 significantly different from LTC nurses' physical health scores. Care aides' mental health scores are even  
35 higher than the ones of LTC nurses.  
36  
37  
38  
39  
40  
41  
42  
43  
44  
45

46 Mental health was especially poor in LTC healthcare workers; all groups except managers had lower  
47 scores than the Canadian population. LTC RNs had lower scores in both physical and mental health than  
48 RNs in PAC. LTC settings are highly stressful work environments. Over 50% of residents need assistance  
49 with almost all activities of daily living, at least two thirds have a diagnosis of dementia, and more than  
50 25% meet criteria for marked frailty.<sup>74,75</sup> LTC staff levels and skill sets have not kept pace with increasing  
51 resident frailty, increased prevalence of dementia and other chronic conditions, or rising dependency.<sup>76,77</sup>  
52  
53  
54  
55  
56  
57  
58  
59  
60

1  
2  
3 As a result, LTC staff report increased workloads and decreased quality of work life.<sup>78,79</sup> Care models in  
4 PAC and LTC differ in important ways. Most PAC centres embody family-integrated care, with a family  
5 member active in the child's care – with positive effects on quality of care, communication between  
6 healthcare workers and families, and parental satisfaction.<sup>80,81</sup> Staffing models also differ substantially.  
7 Most direct care in acute care settings (including PAC<sup>82</sup>) is provided by RNs or LPNs (average 11.5  
8 nursing hours per patient day).<sup>83</sup> In LTC, at least 80% of direct care is provided by care aides (average  
9 slightly over 2 care aide hours per resident day) for a complex and vulnerable population.<sup>84</sup>

### 18 ***Limitations***

20 To compare our data to Canadian normative population-based data, we had to standardize our SF-8 data  
21 for age and sex to the same population (Statistics Canada, 1999<sup>50</sup>) to which we compared our data.<sup>26</sup> Our  
22 data were collected in 2009–2011, so the population data we used were outdated. Statistics Canada data  
23 indicate that the 2011 population<sup>85</sup> was older than in 1999 (31% age 45 years vs. 44%) but otherwise  
24 comparable. Using 2011 population data for standardization might slightly alter our results but would  
25 prevent comparing our results with the only available normative Canadian population health data. Our  
26 analyses are descriptive and our study is cross-sectional, therefore our results show statistical associations  
27 but no causality. While we adjusted our analyses for age and sex by standardizing data sets, we did not  
28 use statistical models allowing concurrent control for multiple covariates. Future studies must assess  
29 predictors and consequences of poor physical/mental health using more advanced statistical methods.  
30  
31  
32  
33  
34  
35  
36  
37  
38  
39  
40  
41

### 42 ***Conclusions***

44 We found important health differences among healthcare worker groups within LTC and PAC. Physicians  
45 and managers had better health than front-line care staff (RNs, LPN, care aides). Health is especially poor  
46 among front-line staff in LTC, who care for a highly vulnerable and medically, functionally, and socially  
47 complex population of older adults (most with dementia).<sup>70,86-88</sup> Mental health of healthcare workers in  
48 LTC is notably worse than the general population, and LTC RNs have lower physical and mental health  
49 than RNs in PAC. Although most research focuses on patient health or the general population, we cannot  
50 neglect healthcare workers in highly complex and stressful environments. Their health affects quality of  
51  
52  
53  
54  
55  
56  
57  
58  
59  
60

1  
2  
3 care. Health measures are largely influenced by individual characteristics, but features of work  
4  
5 environments such as available resources, communication, and leadership may also contribute.<sup>69,89</sup> These  
6  
7 contextual work environment characteristics are modifiable and provide starting points for interventions  
8  
9 to improve workplace health and well-being.  
10  
11  
12  
13  
14  
15  
16  
17  
18  
19  
20  
21  
22  
23  
24  
25  
26  
27  
28  
29  
30  
31  
32  
33  
34  
35  
36  
37  
38  
39  
40  
41  
42  
43  
44  
45  
46  
47  
48  
49  
50  
51  
52  
53  
54  
55  
56  
57  
58  
59  
60

Confidential

## References

1. West CP, Shanafelt TD, Kolars JC. Quality of Life, Burnout, Educational Debt, and Medical Knowledge Among Internal Medicine Residents. *Journal of the American Medical Association*. 2011;306:952-60.
2. Schluter P, Turner C, Huntington A, Bain C, McClure R. Work/life balance and health: The Nurses and Midwives e-cohort Study. *International Nursing Review*. 2011;58:28-36.
3. Lambert VA, Lambert CE, Ito M. Workplace stressors, ways of coping and demographic Characteristics as predictors of physical and mental health of Japanese hospital nurses. *International Journal Of Nursing Studies*. 2004;41:85-97.
4. Knopp-Sihota JA, Niehaus L, Squires JE, Norton PG, Estabrooks CA. Factors associated with rushed and missed resident care in western Canadian nursing homes: A cross-sectional survey of health care aides. *Journal of Clinical Nursing*. 2015;24:2815-25.
5. Chamberlain SA, Gruneir A, Hoben M, Squires JE, Cummings GG, Estabrooks CA. Influence of organizational context on nursing home staff burnout: A cross-sectional survey of care aides in Western Canada. *International Journal of Nursing Studies*. 2017;71:60-9.
6. Aiken LH, Sermeus W, Van den Heede K, et al. Patient safety, satisfaction, and quality of hospital care: cross sectional surveys of nurses and patients in 12 countries in Europe and the United States. *BMJ*. 2012;344.
7. Duffield CM, Roche MA, Homer C, Buchan J, Dimitrelis S. A comparative review of nurse turnover rates and costs across countries. *Journal of Advanced Nursing*. 2014;70:2703-12.
8. Dewa CS, Jacobs P, Thanh NX, Loong D. An estimate of the cost of burnout on early retirement and reduction in clinical hours of practicing physicians in Canada. *BMC Health Services Research*. 2014;14:254.
9. Halbesleben JRB, Rathert C. Linking physician burnout and patient outcomes: Exploring the dyadic relationship between physicians and patients. *Health Care Management Review*. 2008;33:29-39.
10. de Oliveira GSJ, Chang R, Fitzgerald PC, et al. The prevalence of burnout and depression and their association with adherence to safety and practice standards: A survey of United States anesthesiology trainees. *Anesthesia & Analgesia*. 2013;117:182-93.
11. Scheepers RA, Boerebach BCM, Arah OA, Heineman MJ, Lombarts KMJM. A systematic review of the impact of physicians' occupational well-being on the quality of patient care. *International Journal of Behavioral Medicine*. 2015;22:683-98.
12. Cimiotti JP, Aiken LH, Sloane DM, Wu ES. Nurse staffing, burnout, and health care-associated infection. *American Journal of Infection Control*. 2012;40:486-90.
13. Letvak SA, Ruhm CJ, Gupta SN. Nurses' presenteeism and its effects on self-reported quality of care and costs. *The American journal of nursing*. 2012;112:30-8; quiz 48, 39.
14. Wallace JE, Lemaire JB, Ghali WA. Physician wellness: a missing quality indicator. *The Lancet*. 2009;374:1714-21.
15. Ware JE, Kosinski M, Dewey JE, Gandek B. *How to score and interpret single-item health status measures: A manual for users of the SF-8 health survey*. *QualyMetric, Boston, MA*. Boston, MA: QualiMetric, Inc. and Health Assessment Lab; 2001.
16. Aggarwal S. Health-related quality of life and symptom relief in a sample of chronically ill and debilitated medical cannabis patients in urban washington state: Comparisons with normative and chronically ill patient samples (S703). *Journal of Pain and Symptom Management*. 2013;45 (2):417-8.
17. Wei MY, Mukamal K. Multimorbidity and long term physical and mental health-related quality of life in community-dwelling adults. *Journal of General Internal Medicine*. 2016;1):S306.
18. Martin M, Blaisdell-Gross B, Fortin EW, et al. Health-related quality of life of heart failure and coronary artery disease patients improved during participation in disease management programs: a longitudinal observational study. *Dis Manag*. 2007;10:164-78.

19. Eggen MH, Stuge B, Mowinckel P, Jensen KS, Hagen KB. Can supervised group exercises including ergonomic advice reduce the prevalence and severity of low back pain and pelvic girdle pain in pregnancy? A randomized controlled trial. *Phys Ther.* 2012;92:781-90.
20. Shibata Y, Hayasaka S, Goto Y, Ojima T. Effects of water exercise on physiological and psychological health in the Japanese: Kawane Spa Study. *International SportMed Journal.* 2012;13.
21. Hidaka H, Nakazawa T, Kutsukake S, et al. The efficacy of nocturnal administration of branched-chain amino acid granules to improve quality of life in patients with cirrhosis. *J Gastroenterol.* 2013;48:269-76.
22. Hongo M, Miwa H, Kusano M. Effect of rabeprazole treatment on health-related quality of life and symptoms in patients with reflux esophagitis: a prospective multicenter observational study in Japan. *J Gastroenterol.* 2011;46:297-304.
23. Yoh K, Hamaya E, Urushihara H, et al. Quality of life in raloxifene-treated Japanese women with postmenopausal osteoporosis: a prospective, postmarketing observational study. *Curr Med Res Opin.* 2012;28:1757-66.
24. Bachman SS, Walter AW, Umez-Eronini A. Access to oral health care and self-reported health status among low-income adults living with HIV/AIDS. *Public Health Reports.* 2012;127:55-64.
25. Moriya R, Ikeda N. A pilot study of the effects of progressive muscle relaxation on fatigue specific to multiple sclerosis. *British Journal of Neuroscience Nursing.* 2013;9:35-41.
26. Hopman WM, Towheed T, Anastassiades T, et al. Canadian normative data for the SF-36 health survey. Canadian Multicentre Osteoporosis Study Research Group. *CMAJ.* 2000;163:265-71.
27. Holman GT, Thomas RE, Brown KC. A health comparison of Alabama nurses versus US, UK, and Canadian normative populations...one of a two part series. *Journal of Orthopaedic Nursing.* 2009;13:172-82.
28. Tountas Y, Demakakos PTH, Yfantopoulos Y, Aga J, Houliara L, Pavi E. The health related quality of life of the employees in the Greek hospitals: Assessing how healthy are the health workers. *Health and Quality of Life Outcomes.* 2003;1 (no pagination).
29. Ioannou P, Katsikavali V, Galanis P, Velonakis E, Papadatou D, Sourtzi P. Impact of Job Satisfaction on Greek Nurses' Health-Related Quality of Life. *Sh@w.* 2015;6:324-8.
30. Kheiraoui F, Gualano MR, Mannocci A, Boccia A, La Torre G. Quality of life among healthcare workers: A multicentre cross-sectional study in Italy. *Public Health.* 2012;126:624-9.
31. Guler N, Kuzu F. The health-related quality of life of the health professionals working in the primary healthcare centers and its correlation with selected sociodemographic factors in Sivas, a central Anatolian city. *Scientific Research and Essays.* 2009;4:1547-52.
32. Estabrooks CA, Squires JE, Cummings GG, Teare GF, Norton PG. Study protocol for the translating research in elder care (TREC): building context – an organizational monitoring program in long-term care project (project one). *Implement. Sci.* 2009;4:52.
33. Squires JE, Estabrooks CA, Scott SD, et al. The influence of organizational context on the use of research by nurses in Canadian pediatric hospitals. *BMC Health Serv. Res.* 2013;13:351.
34. Stevens BJ, Abbott LK, Yamada J, et al. Epidemiology and management of painful procedures in children in Canadian hospitals. *CMAJ.* 2011;183:E403-10.
35. Ware JE, Jr., Sherbourne CD. The MOS 36-item short-form health survey (SF-36). I. Conceptual framework and item selection. *Med Care.* 1992;30:473-83.
36. McHorney CA, Ware JE, Jr., Raczek AE. The MOS 36-Item Short-Form Health Survey (SF-36): II. Psychometric and clinical tests of validity in measuring physical and mental health constructs. *Med Care.* 1993;31:247-63.
37. McHorney CA, Ware JE, Jr., Lu JF, Sherbourne CD. The MOS 36-item Short-Form Health Survey (SF-36): III. Tests of data quality, scaling assumptions, and reliability across diverse patient groups. *Med Care.* 1994;32:40-66.
38. Ware JE, Jr., Kosinski M, Bayliss MS, McHorney CA, Rogers WH, Raczek A. Comparison of methods for the scoring and statistical analysis of SF-36 health profile and summary measures: summary of results from the Medical Outcomes Study. *Med Care.* 1995;33:AS264-79.

- 1
  - 2
  - 3
  - 4
  - 5
  - 6
  - 7
  - 8
  - 9
  - 10
  - 11
  - 12
  - 13
  - 14
  - 15
  - 16
  - 17
  - 18
  - 19
  - 20
  - 21
  - 22
  - 23
  - 24
  - 25
  - 26
  - 27
  - 28
  - 29
  - 30
  - 31
  - 32
  - 33
  - 34
  - 35
  - 36
  - 37
  - 38
  - 39
  - 40
  - 41
  - 42
  - 43
  - 44
  - 45
  - 46
  - 47
  - 48
  - 49
  - 50
  - 51
  - 52
  - 53
  - 54
  - 55
  - 56
  - 57
  - 58
  - 59
  - 60
39. Haywood KL, Brett J, Tutton E, Staniszewska S. Patient-reported outcome measures in older people with hip fracture: a systematic review of quality and acceptability. *Qual Life Res.* 2017;26:799-812.
40. Poku E, Duncan R, Keetharuth A, et al. Patient-reported outcome measures in patients with peripheral arterial disease: a systematic review of psychometric properties. *Health Qual Life Outcomes.* 2016;14:161.
41. Polinder S, Haagsma JA, van Klaveren D, Steyerberg EW, van Beeck EF. Health-related quality of life after TBI: a systematic review of study design, instruments, measurement properties, and outcome. *Popul Health Metr.* 2015;13:4.
42. Treanor C, Donnelly M. A methodological review of the Short Form Health Survey 36 (SF-36) and its derivatives among breast cancer survivors. *Qual Life Res.* 2015;24:339-62.
43. McPherson A, Martin CR. A review of the measurement properties of the 36-item short-form health survey (SF-36) to determine its suitability for use in an alcohol-dependent population. *J Psychiatr Ment Health Nurs.* 2013;20:114-23.
44. Jenkinson C, Wright L, Coulter A. Criterion validity and reliability of the SF-36 in a population sample. *Qual Life Res.* 1994;3:7-12.
45. Brazier JE, Harper R, Jones NM, et al. Validating the SF-36 health survey questionnaire: new outcome measure for primary care. *Bmj.* 1992;305:160-4.
46. Beaton DE, Hogg-Johnson S, Bombardier C. Evaluating changes in health status: reliability and responsiveness of five generic health status measures in workers with musculoskeletal disorders. *J Clin Epidemiol.* 1997;50:79-93.
47. Essink-Bot ML, Krabbe PF, Bonsel GJ, Aaronson NK. An empirical comparison of four generic health status measures. The Nottingham Health Profile, the Medical Outcomes Study 36-item Short-Form Health Survey, the COOP/WONCA charts, and the EuroQol instrument. *Med Care.* 1997;35:522-37.
48. Hemingway H, Stafford M, Stansfeld S, Shipley M, Marmot M. Is the SF-36 a valid measure of change in population health? Results from the Whitehall II Study. *BMJ : British Medical Journal.* 1997;315:1273-9.
49. Ware JE, Kosinski M, Keller SD. *SF-36 physical and mental health summary scales: a user's manual.* Boston, MA: The Health Institute, New England Medical Centre; 1994.
50. Statistics Canada. 1991 census of population. <http://www12.statcan.gc.ca/datasets/Index-eng.cfm>. Accessed 2017-03-22.
51. Dunnett CW. A multiple comparison procedure for comparing several treatments with a control. *Journal of the American Statistical Association.* 1955;50:1096-121.
52. Dunnett CW. New tables for multiple comparisons with a control. *Biometrics.* 1964;20:482-91.
53. Westfall PH. *Multiple comparisons and multiple tests using SAS.* 2nd ed. Cary, NC: SAS Publications; 2011.
54. Tukey JW. Comparing individual means in the analysis of variance. *Biometrics.* 1949;5:99-114.
55. Kramer CY. Extension of multiple range tests to group means with unequal numbers of replications. *Biometrics.* 1956;12:307-10.
56. Suner-Soler R, Grau-Martin A, Font-Mayolas S, Gras ME, Bertran C, Sullman MJ. Burnout and quality of life among Spanish healthcare personnel. *Journal of Psychiatric & Mental Health Nursing.* 2013;20:305-13.
57. Kay M, Mitchell G, Clavarino A, Doust J. Doctors as patients: a systematic review of doctors' health access and the barriers they experience. *The British journal of general practice : the journal of the Royal College of General Practitioners.* 2008;58:501-8.
58. Kay MP, Mitchell GK, Del Mar CB. Doctors do not adequately look after their own physical health. *The Medical journal of Australia.* 2004;181:368-70.
59. Brooks SK, Gerada C, Chalder T. Review of literature on the mental health of doctors: are specialist services needed? *Journal of mental health (Abingdon, England).* 2011;20:146-56.
60. Letvak S. We cannot ignore nurses' health anymore: a synthesis of the literature on evidence-based strategies to improve nurse health. *Nursing administration quarterly.* 2013;37:295-308.

- 1
  - 2
  - 3
  - 4
  - 5
  - 6
  - 7
  - 8
  - 9
  - 10
  - 11
  - 12
  - 13
  - 14
  - 15
  - 16
  - 17
  - 18
  - 19
  - 20
  - 21
  - 22
  - 23
  - 24
  - 25
  - 26
  - 27
  - 28
  - 29
  - 30
  - 31
  - 32
  - 33
  - 34
  - 35
  - 36
  - 37
  - 38
  - 39
  - 40
  - 41
  - 42
  - 43
  - 44
  - 45
  - 46
  - 47
  - 48
  - 49
  - 50
  - 51
  - 52
  - 53
  - 54
  - 55
  - 56
  - 57
  - 58
  - 59
  - 60
61. Fronteira I, Ferrinho P. Do nurses have a different physical health profile? A systematic review of experimental and observational studies on nurses' physical health. *Journal of Clinical Nursing*. 2011;20:2404-24.
62. Estabrooks CA, Squires JE, Carleton HL, Cummings GG, Norton PG. Who is looking after Mom and Dad? Unregulated workers in Canadian long-term care homes. *Can. J. Aging*. 2015;34:47-59.
63. Berta W, Laporte A, Deber R, Baumann A, Gamble B. The evolving role of health care aides in the long-term care and home and community care sectors in Canada. *Hum. Resour. Health*. 2013;11:25.
64. Bureau of Labor Statistics. Occupational employment statistics: May 2014 national industry-specific occupational employment and wage estimates, NAICS 623100 - nursing care facilities (skilled nursing facilities). 2014; [http://www.bls.gov/oes/current/naics4\\_623100.htm#29-0000](http://www.bls.gov/oes/current/naics4_623100.htm#29-0000). Accessed 06 Nov 2016.
65. Paraprofessional Healthcare Institute (PHI). *America's direct-care workforce*. Bronx, NY: PHI; 2013.
66. Hewko SJ, Cooper SL, Huynh H, et al. Invisible no more: a scoping review of the health care aide workforce literature. *BMC Nurs*. 2015;14:38.
67. Mallidou AA, Cummings GG, Schalm C, Estabrooks CA. Health care aides use of time in a residential long-term care unit: A time and motion study. *Int. J. Nurs. Stud*. 2013;50:1229-39.
68. Zeller A, Hahn S, Needham I, Kok G, Dassen T, Halfens RJ. Aggressive behavior of nursing home residents toward caregivers: a systematic literature review. *Geriatr. Nurs*. 2009;30:174-87.
69. Squires JE, Hoben M, Linklater S, Carleton HL, Estabrooks CA. Job satisfaction among care aides in residential long-term care: A systematic review of contributing factors, both individual and organizational. *Nurs. Res. Pract*. 2015;2015.
70. Estabrooks CA, Poss JW, Squires JE, et al. A profile of residents in prairie nursing homes. *Can. J. Aging*. 2013;32:223-31.
71. Liang YW, Hsieh Y, Lin YH, Chen WY. The impact of job stressors on health-related quality of life of nursing assistants in long-term care settings. *Geriatric Nursing*. 2014;35:114-9.
72. Zhang Y, Punnett L, Gore R. Relationships among employees' working conditions, mental health, and intention to leave in nursing homes. *Journal of Applied Gerontology*. 2014;33:6-23.
73. Pelissier C, Fontana L, Fort E, et al. Impaired mental well-being and psychosocial risk: a cross-sectional study in female nursing home direct staff. *BMJ Open*. 2015;5:e007190.
74. Armstrong JJ, Stolee P, Hirdes JP, Poss JW. Examining three frailty conceptualizations in their ability to predict negative outcomes for home-care clients. *Age and Ageing*. 2010;39:755-8.
75. Hogan DB, Freiheit EA, Strain LA, et al. Comparing frailty measures in their ability to predict adverse outcome among older residents of assisted living. *BMC Geriatrics*. 2012;12.
76. Feng Z, Grabowski DC, Intrator O, Zinn J, Mor V. Medicaid payment rates, case-mix reimbursement, and nursing home staffing--1996-2004. *Medical Care*. 2008;46:33-40.
77. McGregor MJ, Tate RB, Ronald LA, et al. Trends in long-term care staffing by facility ownership in British Columbia, 1996 to 2006. *Health Reports*. 2010;21:27-33.
78. Bostick JE. Relationship of nursing personnel and nursing home care quality. *Journal of Nursing Care Quality*. 2004;19:130-6.
79. WHO. *Dementia: A public health priority*. Geneva: World Health Organization;2012.
80. Curtis K, Foster K, Mitchell R, Van C. Models of Care Delivery for Families of Critically Ill Children: An Integrative Review of International Literature. *Journal of pediatric nursing*. 2016;31:330-41.
81. Shields L, Zhou H, Pratt J, Taylor M, Hunter J, Pascoe E. Family-centred care for hospitalised children aged 0-12 years. *The Cochrane database of systematic reviews*. 2012;10:Cd004811.
82. Tubbs-Cooley HL, Cimiotti JP, Silber JH, Sloane DM, Aiken LH. An observational study of nurse staffing ratios and hospital readmission among children admitted for common conditions. *BMJ quality & safety*. 2013;22:735-42.
83. Needleman J, Buerhaus P, Mattke S, Stewart M, Zelevinsky K. Nurse-staffing levels and the quality of care in hospitals. *The New England journal of medicine*. 2002;346:1715-22.

- 1
- 2
- 3
- 4 84. Cummings GG, Doupe M, Ginsburg L, McGregor MJ, Norton PG, Estabrooks CA. Development and
- 5 Validation of A Scheduled Shifts Staffing (ASSiST) Measure of Unit-Level Staffing in Nursing
- 6 Homes. *Gerontologist*. 2016.
- 7
- 8 85. Statistics Canada. 2011 census of population. <http://www12.statcan.gc.ca/datasets/Index-eng.cfm>.
- 9 Accessed 2017-04-28.
- 10 86. Hirdes JP, Mitchell L, Maxwell CJ, White N. Beyond the 'iron lungs of gerontology': Using evidence
- 11 to shape the future of nursing homes in Canada. *Can. J. Aging*. 2011;30:371-90.
- 12 87. Hoffmann F, Kaduszkiewicz H, Glaeske G, van den Bussche H, Koller D. Prevalence of dementia in
- 13 nursing home and community-dwelling older adults in Germany. *Aging Clin Exp Res*. 2014;26:555-9.
- 14 88. Stewart R, Hotopf M, Dewey M, et al. Current prevalence of dementia, depression and behavioural
- 15 problems in the older adult care home sector: the South East London Care Home Survey. *Age and*
- 16 *ageing*. 2014;43:562-7.
- 17 89. Estabrooks CA, Squires JE, Hayduk L, et al. The Influence of organizational context on best practice
- 18 use by care aides in residential long-term care settings. *J. Am. Med. Dir. Assoc*. 2015;16:537.e1-10.
- 19
- 20
- 21
- 22
- 23
- 24
- 25
- 26
- 27
- 28
- 29
- 30
- 31
- 32
- 33
- 34
- 35
- 36
- 37
- 38
- 39
- 40
- 41
- 42
- 43
- 44
- 45
- 46
- 47
- 48
- 49
- 50
- 51
- 52
- 53
- 54
- 55
- 56
- 57
- 58
- 59
- 60

Confidential



**Table 1: Health domains measured by the SF-8, definitions and response options**

| Health domain        | Definition                                                                                                                | Response options                 | Assigned SF-36 score* | SF-8 US norm scores <sup>†</sup> |
|----------------------|---------------------------------------------------------------------------------------------------------------------------|----------------------------------|-----------------------|----------------------------------|
| General health       | Overall rating of health in past week                                                                                     | Very poor                        | 22.8                  | 49.4                             |
|                      |                                                                                                                           | Poor                             | 32.6                  |                                  |
|                      |                                                                                                                           | Fair                             | 38.4                  |                                  |
|                      |                                                                                                                           | Good                             | 46.4                  |                                  |
|                      |                                                                                                                           | Very good                        | 52.8                  |                                  |
|                      |                                                                                                                           | Excellent                        | 59.5                  |                                  |
| Physical functioning | Extent of physical health problems limiting usual physical activities (e.g., walking, climbing stairs) in past week       | Could not do physical activities | 21.5                  | 48.3                             |
|                      |                                                                                                                           | Quite a lot                      | 30.3                  |                                  |
|                      |                                                                                                                           | Somewhat                         | 40.1                  |                                  |
|                      |                                                                                                                           | Very little                      | 48.3                  |                                  |
|                      |                                                                                                                           | Not at all                       | 54.1                  |                                  |
|                      |                                                                                                                           |                                  |                       |                                  |
| Role – physical      | Extent of difficulties in past week doing daily work (at home and away from home) because of physical health              | Could not do daily work          | 23.0                  | 48.59                            |
|                      |                                                                                                                           | Quite a lot                      | 28.3                  |                                  |
|                      |                                                                                                                           | Somewhat                         | 38.7                  |                                  |
|                      |                                                                                                                           | Very little                      | 46.9                  |                                  |
|                      |                                                                                                                           | Not at all                       | 54.0                  |                                  |
|                      |                                                                                                                           |                                  |                       |                                  |
| Bodily pain          | Extent of bodily pain in past week                                                                                        | Very severe                      | 25.5                  | 50.0                             |
|                      |                                                                                                                           | Severe                           | 31.5                  |                                  |
|                      |                                                                                                                           | Moderate                         | 40.1                  |                                  |
|                      |                                                                                                                           | Mild                             | 47.7                  |                                  |
|                      |                                                                                                                           | Very mild                        | 53.4                  |                                  |
|                      |                                                                                                                           | None                             | 60.8                  |                                  |
| Vitality             | Extent of energy in past week                                                                                             | None                             | 28.1                  | 50.1                             |
|                      |                                                                                                                           | A little                         | 35.8                  |                                  |
|                      |                                                                                                                           | Some                             | 45.2                  |                                  |
|                      |                                                                                                                           | Quite a lot                      | 55.6                  |                                  |
|                      |                                                                                                                           | Very much                        | 61.8                  |                                  |
|                      |                                                                                                                           |                                  |                       |                                  |
| Social functioning   | Extent of physical health or emotional problems limiting usual social activities with family or friends in past week      | Could not do social activities   | 23.4                  | 48.5                             |
|                      |                                                                                                                           | Quite a lot                      | 29.5                  |                                  |
|                      |                                                                                                                           | Somewhat                         | 40.4                  |                                  |
|                      |                                                                                                                           | Very little                      | 49.5                  |                                  |
|                      |                                                                                                                           | Not at all                       | 55.3                  |                                  |
|                      |                                                                                                                           |                                  |                       |                                  |
| Role – emotional     | Extent of personal or emotional problems in past week limiting ability to do usual work, school or other daily activities | Could not do daily activities    | 21.7                  | 47.0                             |
|                      |                                                                                                                           | Quite a lot                      | 29.3                  |                                  |
|                      |                                                                                                                           | Somewhat                         | 38.1                  |                                  |
|                      |                                                                                                                           | Very little                      | 45.7                  |                                  |
|                      |                                                                                                                           | Not at all                       | 52.4                  |                                  |
|                      |                                                                                                                           |                                  |                       |                                  |
| Mental health        | Extent of having been bothered by emotional problems (e.g., feeling anxious, depressed, irritable) in past week           | Extremely                        | 21.4                  | 49.0                             |
|                      |                                                                                                                           | Quite a lot                      | 31.6                  |                                  |
|                      |                                                                                                                           | Somewhat                         | 41.5                  |                                  |
|                      |                                                                                                                           | Very little                      | 49.6                  |                                  |
|                      |                                                                                                                           | Not at all                       | 58.8                  |                                  |
|                      |                                                                                                                           |                                  |                       |                                  |

\*The SF-36 measures each health domain, using 2–10 Likert-scaled items. Health domains in the SF-36 are scored by transforming the score of each item (minimum 1, maximum 2–6, depending on the item) into a 0–100 scale, and averaging scores of each health domain. Therefore, SF-36 health domain scores have a possible range of 0–100, while SF-8 health domain scores have smaller possible ranges.

<sup>†</sup>Health domain scores above and below the respective normative health domain score indicate above or below average health, respectively, as compared to the US normative population.

**Table 2: Sample characteristics by care provider group and study setting**

|                                  | Physicians<br>(PAC*) | RNs†<br>(LTC‡) | RNs†<br>(PAC*)    | LPNs§<br>(LTC‡) | Care aides<br>(LTC‡) | Allied¶<br>(LTC‡) | Allied¶<br>(PAC*) | Educators<br>(PAC*) | Managers<br>(LTC‡) | Managers<br>(PAC*) |
|----------------------------------|----------------------|----------------|-------------------|-----------------|----------------------|-------------------|-------------------|---------------------|--------------------|--------------------|
| <b>Sample size</b>               | N=63                 | N=169          | N=747             | N=139           | N=1,506              | N=145             | N=155             | N=49                | N=69               | N=22               |
| <b>Age (years), N (%)</b>        |                      |                |                   |                 |                      |                   |                   |                     |                    |                    |
| <25                              | —                    | 6 (3.6%)       | 61 (8.2%)         | 3 (2.2%)        | 83 (5.5%)            | 11 (7.6%)         | 3 (1.9%)          | —                   | —                  | —                  |
| 25-34                            | 15 (23.8%)           | 13 (7.7%)      | 323 (43.2%)       | 23 (16.5%)      | 251 (16.7%)          | 31 (21.4%)        | 62 (40%)          | 14 (28.6%)          | 5 (7.2%)           | 3 (13.6%)          |
| 35-44                            | 20 (31.7%)           | 40 (23.7%)     | 145 (19.4%)       | 43 (30.9%)      | 409 (27.2%)          | 35 (24.1%)        | 49 (31.6%)        | 17 (34.7%)          | 20 (29%)           | 7 (1.8%)           |
| 45-54                            | 14 (22.2%)           | 47 (27.8%)     | 156 (20.9%)       | 42 (30.2%)      | 471 (31.3%)          | 46 (31.7%)        | 32 (20.6%)        | 15 (30.6%)          | 20 (29%)           | 9 (40.9%)          |
| 55-65                            | 12 (19%)             | 48 (28.4%)     | 58 (7.8%)         | 26 (18.7%)      | 270 (17.9%)          | 20 (13.8%)        | 9 (5.8%)          | 3 (6.1%)            | 24 (34.8%)         | 3 (13.6%)          |
| >65                              | 2 (3.2%)             | 15 (8.9%)      | 3 (0.4%)          | —               | 21 (1.4%)            | 2 (1.4%)          | —                 | —                   | —                  | —                  |
| Missing                          | —                    | —              | 1 (0.1%)          | 2 (1.4%)        | 1 (0.1%)             | —                 | —                 | —                   | —                  | —                  |
| $p_{(LTC\ vs\ PAC)}^{\parallel}$ | —                    | —              | <b>&lt;0.0001</b> | —               | —                    | —                 | <b>0.001</b>      | —                   | —                  | 0.163              |
| <b>Sex, N (%)</b>                |                      |                |                   |                 |                      |                   |                   |                     |                    |                    |
| Male                             | 30 (47.6%)           | 14 (8.3%)      | 43 (5.8%)         | 11 (7.9%)       | 105 (7%)             | 17 (11.7%)        | 21 (13.5%)        | 5 (10.2%)           | 5 (7.2%)           | 1 (4.5%)           |
| Female                           | 33 (52.4%)           | 152 (89.9%)    | 703 (94.1%)       | 126 (90.6%)     | 1399 (92.9%)         | 118 (81.4%)       | 134 (86.5%)       | 43 (87.8%)          | 62 (89.9%)         | 21 (95.5%)         |
| Missing                          | —                    | 3 (1.8%)       | 1 (0.1%)          | 2 (1.4%)        | 2 (0.1%)             | 10 (6.9%)         | —                 | 1 (2.0%)            | 2 (2.9%)           | —                  |
| $p_{(LTC\ vs\ PAC)}^{\parallel}$ | —                    | —              | 0.199             | —               | —                    | —                 | 0.810             | —                   | —                  | 0.636              |
| <b>Highest education, N (%)</b>  |                      |                |                   |                 |                      |                   |                   |                     |                    |                    |
| High school degree or less       | —                    | —              | —                 | —               | 244 (16.2%)          | 7 (4.8%)          | —                 | —                   | —                  | —                  |
| HCA certificate                  | —                    | —              | —                 | —               | 1259 (83.6%)         | —                 | —                 | —                   | —                  | —                  |
| Diploma/certificate              | —                    | 111 (65.7%)    | 223 (29.9%)       | 126 (90.6%)     | —                    | 55 (37.9%)        | 28 (18.1%)        | 3 (6.1%)            | 29 (42.0%)         | 4 (18.2%)          |
| Bachelor's degree or higher      | 63 (100.0%)          | 58 (34.3%)     | 522 (69.9%)       | 12 (8.6%)       | —                    | 83 (57.2%)        | 127 (81.9%)       | 46 (93.9%)          | 40 (58.0%)         | 18 (81.8%)         |
| Missing                          | —                    | —              | 2 (0.3%)          | 1 (0.7%)        | 3 (0.2%)             | —                 | —                 | —                   | —                  | —                  |
| $p_{(LTC\ vs\ PAC)}^{\parallel}$ | —                    | —              | <b>&lt;0.0001</b> | —               | —                    | —                 | <b>&lt;0.0001</b> | —                   | —                  | 0.128              |
| <b>Job experience, M (SD)</b>    |                      |                |                   |                 |                      |                   |                   |                     |                    |                    |
| Years worked on unit/in facility | 13.7 (10.9)          | 6.0 (6.3)      | 13.4 (10.1)       | 4.6 (4.7)       | 5.5 (6.3)            | 6.3 (7)           | 12.1 (8.0)        | 15.3 (9.9)          | 7.8 (7.8)          | 17.7 (10.8)        |
| $p_{(LTC\ vs\ PAC)}^{**}$        | —                    | —              | <b>&lt;0.0001</b> | —               | —                    | —                 | <b>&lt;0.0001</b> | —                   | —                  | <b>0.001</b>       |
| Years worked in current role     | 19.4 (12.1)          | 11.7 (10.8)    | 14.1 (10.9)       | 11.7 (11.1)     | 10.9 (8.9)           | 8.0 (7.6)         | 16.9 (9.8)        | 20.0 (12.4)         | 7.1 (7.6)          | 8.7 (6.1)          |
| $p_{(LTC\ vs\ PAC)}^{**}$        | —                    | —              | <b>0.012</b>      | —               | —                    | —                 | <b>&lt;0.0001</b> | —                   | —                  | 0.358              |
| <b>Clinical specialty, N (%)</b> |                      |                |                   |                 |                      |                   |                   |                     |                    |                    |
| Critical care                    | 22 (34.9%)           | —              | 319 (42.7%)       | —               | —                    | —                 | 80 (51.6%)        | 21 (42.9%)          | —                  | 12 (54.5%)         |
| Medical                          | 17 (27.0%)           | —              | 283 (37.9%)       | —               | —                    | —                 | 40 (25.8%)        | 16 (32.7%)          | —                  | 6 (27.3%)          |
| Surgical                         | 24 (38.1%)           | —              | 145 (19.4%)       | —               | —                    | —                 | 35 (22.6%)        | 12 (24.5%)          | —                  | 4 (18.2%)          |
| <b>Province</b>                  |                      |                |                   |                 |                      |                   |                   |                     |                    |                    |
| Saskatchewan                     | —                    | 53 (31.4%)     | —                 | 18 (12.9%)      | 333 (22.1%)          | 14 (9.7%)         | —                 | —                   | 12 (17.4%)         | —                  |
| Alberta                          | 8 (12.7%)            | 72 (42.6%)     | 69 (9.2%)         | 71 (51.1%)      | 837 (55.6%)          | 93 (64.1%)        | 9 (5.8%)          | —                   | 26 (37.7%)         | 5 (22.7%)          |
| Manitoba                         | 16 (25.4%)           | 44 (26.0%)     | 80 (10.7%)        | 50 (36.0%)      | 336 (22.3%)          | 38 (26.2%)        | 20 (12.9%)        | 5 (10.2%)           | 31 (44.9%)         | 2 (9.1%)           |
| British Columbia                 | 10 (15.9%)           | —              | 129 (17.3%)       | —               | —                    | —                 | 46 (29.7%)        | 8 (16.3%)           | —                  | 4 (18.2%)          |
| Nova Scotia                      | 17 (27.0%)           | —              | 107 (14.3%)       | —               | —                    | —                 | 38 (24.5%)        | 12 (24.5%)          | —                  | 5 (22.7%)          |
| Ontario                          | 3 (4.8%)             | —              | 217 (29.0%)       | —               | —                    | —                 | 24 (15.5%)        | 13 (26.5%)          | —                  | 2 (9.1%)           |
| Quebec                           | 9 (14.3%)            | —              | 145 (19.4%)       | —               | —                    | —                 | 18 (11.6%)        | 11 (22.4%)          | —                  | 4 (18.2%)          |

Note: N = number of individuals, % = percent of individuals, M = mean, SD = standard deviation

\*PAC = pediatric acute care

†RNs = registered nurses

‡LTC = long term care

<sup>§</sup>LPNs = licensed practical nurses

<sup>||</sup>Allied = allied healthcare providers

<sup>¶</sup>Based on a two-tailed Fisher's exact test

<sup>\*\*</sup>Based on a two-tailed t-test for independent samples

Confidential

1  
2  
3  
4  
5  
6  
7  
8  
9  
10  
11  
12  
13  
14  
15  
16  
17  
18  
19  
20  
21  
22  
23  
24  
25  
26  
27  
28  
29  
30  
31  
32  
33  
34  
35  
36  
37  
38  
39  
40  
41  
42  
43  
44  
45  
46  
47  
48  
49

**Table 3: Age- and sex-adjusted SF-8 sub-scores by care provider group and study setting**

|                             | Physicians<br>(PAC*) | RNs†<br>(LTC‡) | RNs†<br>(PAC*) | LPNs§<br>(LTC‡) | Care aides<br>(LTC‡) | Allied  <br>(LTC‡) | Allied  <br>(PAC*) | Educators<br>(PAC*) | Managers<br>(LTC‡) | Managers<br>(PAC*) |
|-----------------------------|----------------------|----------------|----------------|-----------------|----------------------|--------------------|--------------------|---------------------|--------------------|--------------------|
| <b>General health</b>       | N=62                 | N=168          | N=745          | N=139           | N=1,502              | N=144              | N=155              | N=49                | N=69               | N=22               |
| M (SD)                      | 54.6 (5.4)           | 48.0 (6.7)     | 50.1 (7.4)     | 51 (6.4)        | 50.2 (7.5)           | 51.8 (7.5)         | 48.8 (8.6)         | 51 (5.7)            | 50.3 (5.8)         | 55.5 (5.1)         |
| 95% CI                      | 53.8; 55.4           | 47.0; 49.0     | 49.5; 50.7     | 49.8; 52.2      | 49.8; 50.6           | 50.7; 53.0         | 47.6; 50.0         | 48.9; 53.1          | 48.2; 52.3         | 52.0; 59.1         |
| % ceiling                   | 29.0%                | 15.5%          | 13.2%          | 20.1%           | 16.0%                | 18.1%              | 18.1%              | 16.3%               | 27.5%              | 36.4%              |
| <b>Physical functioning</b> | N=62                 | N=168          | N=745          | N=139           | N=1,503              | N=145              | N=155              | N=49                | N=69               | N=22               |
| M (SD)                      | 52.8 (3.4)           | 49.4 (5.7)     | 49.3 (6.3)     | 49.5 (5.4)      | 49.0 (7.1)           | 50.9 (5.1)         | 49.9 (5.7)         | 49.5 (5.3)          | 50.5 (5.5)         | 52.9 (3.0)         |
| 95% CI                      | 52.3; 53.3           | 48.6; 50.2     | 48.9; 49.8     | 48.6; 50.5      | 48.6; 49.4           | 50.2; 51.7         | 49.1; 50.7         | 47.6; 51.4          | 48.5; 52.5         | 50.8; 55.0         |
| % ceiling                   | 79.0%                | 53.6%          | 50.1%          | 53.2%           | 47.3%                | 53.8%              | 52.9%              | 49.0%               | 65.2%              | 77.3%              |
| <b>Role – physical</b>      | N=62                 | N=168          | N=744          | N=139           | N=1,502              | N=142              | N=155              | N=49                | N=68               | N=22               |
| M (SD)                      | 52.1 (4.8)           | 49.1 (6.0)     | 50.1 (6.1)     | 48.5 (6.2)      | 48.4 (7.7)           | 50.9 (5.8)         | 48.2 (7)           | 50.0 (4.8)          | 50.7 (5.7)         | 53.8 (1.1)         |
| 95% CI                      | 51.3; 52.8           | 48.3; 50.0     | 49.7; 50.6     | 47.4; 49.6      | 48.0; 48.8           | 50.0; 51.7         | 47.2; 49.2         | 48.3; 51.8          | 48.6; 52.7         | 53.0; 54.6         |
| % ceiling                   | 74.2%                | 57.7%          | 55.2%          | 57.6%           | 50.3%                | 58.5%              | 58.1%              | 59.2%               | 66.2%              | 95.5%              |
| <b>Bodily pain</b>          | N=62                 | N=164          | N=745          | N=138           | N=1,503              | N=141              | N=155              | N=49                | N=69               | N=22               |
| M (SD)                      | 55.9 (5.4)           | 47.6 (7.7)     | 50.7 (7.1)     | 49.7 (5.7)      | 50.2 (8.2)           | 53.4 (7.9)         | 52.4 (6.9)         | 50.9 (6.5)          | 53.2 (6.4)         | 51.6 (7.3)         |
| 95% CI                      | 55.1; 56.7           | 46.5; 48.7     | 50.2; 51.3     | 48.6; 50.7      | 49.8; 50.62          | 52.2; 54.6         | 51.4; 53.3         | 48.5; 53.2          | 50.9; 55.5         | 46.5; 56.6         |
| % ceiling                   | 45.2%                | 22.0%          | 19.9%          | 16.7%           | 22.4%                | 24.8%              | 22.6%              | 20.4%               | 30.4%              | 31.8%              |
| <b>Vitality</b>             | N=62                 | N=169          | N=745          | N=139           | N=1,502              | N=143              | N=155              | N=49                | N=68               | N=22               |
| M (SD)                      | 54.1 (5.5)           | 50.8 (7.3)     | 52.3 (7.1)     | 50.3 (7.6)      | 53.8 (7.5)           | 53.2 (6.3)         | 48.4 (9.1)         | 51 (6.3)            | 55.5 (6.5)         | 53.5 (5.6)         |
| 95% CI                      | 53.2; 54.9           | 49.8; 51.8     | 51.7; 52.9     | 48.9; 51.7      | 53.4; 54.2           | 52.2; 54.1         | 47.1; 49.6         | 48.7; 53.3          | 53.2; 57.9         | 49.6; 57.5         |
| % ceiling                   | 12.9%                | 17.8%          | 7.4%           | 16.5%           | 27.8%                | 10.5%              | 7.7%               | 4.1%                | 11.8%              | 13.6%              |
| <b>Social functioning</b>   | N=62                 | N=166          | N=744          | N=137           | N=1,502              | N=142              | N=155              | N=49                | N=69               | N=22               |
| M (SD)                      | 52.3 (5.2)           | 47.2 (6.9)     | 48.1 (6.9)     | 46.3 (7.0)      | 47.3 (8.8)           | 49.6 (6.9)         | 48.5 (5.2)         | 50.0 (5.1)          | 49.8 (7.3)         | 51.9 (6.5)         |
| 95% CI                      | 51.5; 53.0           | 46.2; 48.2     | 47.6; 48.7     | 45.0; 47.6      | 46.9; 47.8           | 48.5; 50.6         | 47.7; 49.2         | 48.2; 51.9          | 47.2; 52.5         | 47.3; 56.4         |
| % ceiling                   | 46.8%                | 39.2%          | 27.6%          | 35.8%           | 37.1%                | 33.1%              | 34.2%              | 30.6%               | 42.0%              | 59.1%              |
| <b>Role – emotional</b>     | N=62                 | N=169          | N=744          | N=135           | N=1,505              | N=141              | N=155              | N=49                | N=69               | N=22               |
| M (SD)                      | 50.2 (3.7)           | 46.5 (6.1)     | 47.4 (5.8)     | 47.3 (4.8)      | 47.2 (6.8)           | 46.6 (5.5)         | 46.5 (6.4)         | 44.7 (6.0)          | 49.0 (5.1)         | 50.8 (3.8)         |
| 95% CI                      | 49.6; 50.8           | 45.7; 47.4     | 47.0; 47.9     | 46.4; 48.2      | 49.7; 50.6           | 45.8; 47.4         | 45.6; 47.4         | 42.1; 46.9          | 47.2; 50.9         | 48.1; 53.5         |
| % ceiling                   | 59.7%                | 56.8%          | 45.2%          | 51.9%           | 51.8%                | 48.9%              | 52.3%              | 42.9%               | 68.1%              | 72.7%              |
| <b>Mental health</b>        | N=62                 | N=168          | N=745          | N=138           | N=1,504              | N=143              | N=155              | N=49                | N=69               | N=22               |
| M (SD)                      | 52.9 (4.7)           | 47.5 (8.1)     | 49.5 (7.2)     | 47.4 (7.2)      | 50.1 (8.3)           | 47.8 (7.3)         | 50.6 (6.2)         | 47.9 (6.3)          | 50.0 (6.0)         | 49.8 (8.9)         |
| 95% CI                      | 52.2; 53.6           | 46.1; 48.6     | 48.9; 50.1     | 46.0; 48.7      | 46.8; 47.5           | 46.7; 48.9         | 49.7; 51.5         | 45.6; 50.1          | 47.8; 52.1         | 43.6; 56.0         |
| % ceiling                   | 32.3%                | 35.1%          | 28.5%          | 34.8%           | 41.3%                | 30.8%              | 29.0%              | 28.6%               | 42.0%              | 31.8%              |

Note: N = number of individuals (may differ from sample size reported in table 2 due to missing data), M = mean, SD = standard deviation, 95% CI = 95% confidence interval; % ceiling = percent of participants who selected the response category representing the best possible health status

\*PAC = pediatric acute care

†RNs = registered nurses

‡LTC = long term care

§LPNs = licensed practical nurses

||Allied = allied healthcare providers

**Table 4: Comparison of age- and sex-adjusted SF-8 sub-scores among care provider groups working in long term care and pediatric acute care settings**

|                      | Registered Nurses |                   | Allied Health Providers |                   | Managers          |              |
|----------------------|-------------------|-------------------|-------------------------|-------------------|-------------------|--------------|
|                      | MD [95% CI]       | P*                | MD [95% CI]             | P*                | MD [95% CI]       | P*           |
| General health       | -2.1 [-3.7; -0.5] | <b>0.004</b>      | 3.0 [0.8; 5.1]          | <b>0.002</b>      | -5.2 [-9.6; -0.8] | <b>0.016</b> |
| Physical functioning | 0.1 [-1.2; 1.4]   | 1.000             | 1.0 [-0.7; 2.7]         | 0.463             | -2.4 [-5.8; 1.0]  | 0.287        |
| Role – physical      | -1.0 [-2.3; 0.3]  | 0.212             | 2.7 [0.9; 4.5]          | <b>0.001</b>      | -3.1 [-6.6; 0.4]  | 0.125        |
| Bodily pain          | -3.1 [-4.7; -1.5] | <b>&lt;0.0001</b> | 1.0 [-1.1; 3.1]         | 0.649             | 1.6 [-2.5; 5.7]   | 0.774        |
| Vitality             | -1.5 [-3.1; 0.1]  | 0.066             | 4.8 [2.7; 6.9]          | <b>&lt;0.0001</b> | 2.0 [-2.1; 6.1]   | 0.618        |
| Social functioning   | -0.9 [-2.4; 0.6]  | 0.407             | 1.1 [-0.9; 3.1]         | 0.496             | -2.1 [-5.9; 1.7]  | 0.513        |
| Role – emotional     | -0.9 [-2.2; 0.4]  | 0.260             | 0.1 [-1.6; 1.8]         | 1.000             | -1.8 [-5.1; 1.5]  | 0.521        |
| Mental health        | -2.0 [-3.6; -0.4] | <b>0.006</b>      | -2.8 [-4.9; -0.7]       | <b>0.004</b>      | 0.2 [-3.9; 4.3]   | 1.000        |

Note: MD = mean difference (mean for long term care minus mean for pediatric acute care); 95% CI = 95% confidence Interval

\*Based on analyses of variance (ANOVA), including Dunnett-adjusted post-hoc comparisons of each care provider group with normative data

Confidential

**Table 5: Age- and sex-adjusted SF-8 physical and mental component summary scores by care provider group and care setting, compared to age and sex adjusted SF-36 normative data**

|                                         | Physical Component Summary Score |      |     |            |                          |                  | Mental Component Summary Score |     |            |                          |                   |
|-----------------------------------------|----------------------------------|------|-----|------------|--------------------------|------------------|--------------------------------|-----|------------|--------------------------|-------------------|
|                                         | N                                | M    | SD  | 95% CI     | MD [95% CI]              | P*               | M                              | SD  | 95% CI     | MD [95% CI]*             | P*                |
| Normative data                          | 9,367                            | 50.5 | 9.0 | 50.3; 50.7 | —                        | —                | 51.7                           | 9.1 | 51.5; 51.9 | —                        | —                 |
| Physicians (PAC <sup>†</sup> )          | 62                               | 54.9 | 5.3 | 54.1; 55.7 | <b>4.4 [1.3; 7.5]</b>    | <b>0.001</b>     | 53.6                           | 5.5 | 52.7; 54.4 | 1.9 [-1.3; 5.1]          | 0.646             |
| RNs <sup>‡</sup> (LTC <sup>§</sup> )    | 159                              | 49.1 | 7.3 | 48.0; 50.2 | -1.4 [-3.3; 0.5]         | 0.363            | 47.1                           | 9.4 | 45.7; 48.5 | <b>-4.6 [-6.6; -2.6]</b> | <b>&lt;0.0001</b> |
| RNs <sup>‡</sup> (PAC <sup>†</sup> )    | 740                              | 50.9 | 7.2 | 50.3; 51.4 | 0.4 [-0.5; 1.3]          | 0.925            | 49.7                           | 8.5 | 49.0; 50.4 | <b>-2.0 [-3.0; -1.0]</b> | <b>&lt;0.0001</b> |
| LPNs <sup>  </sup> (LTC <sup>§</sup> )  | 131                              | 50.5 | 6.4 | 49.3; 51.8 | 0.0 [2.1; -2.1]          | 1.000            | 47.3                           | 8.5 | 45.7; 48.9 | <b>-4.4 [-6.6; -2.2]</b> | <b>&lt;0.0001</b> |
| Care aides (LTC <sup>§</sup> )          | 1,490                            | 49.7 | 8.2 | 49.3; 50.2 | <b>-0.8 [-1.5; -0.1]</b> | <b>0.010</b>     | 50.6                           | 9.3 | 50.1; 51.1 | <b>-1.1 [-1.8; -0.4]</b> | <b>&lt;0.001</b>  |
| Allied <sup>¶</sup> (LTC <sup>§</sup> ) | 131                              | 53.7 | 7.4 | 52.5; 54.8 | <b>3.2 [1.1; 5.3]</b>    | <b>&lt;0.001</b> | 48.5                           | 8.3 | 47.2; 49.8 | <b>-3.2 [-5.4; -1.0]</b> | <b>&lt;0.001</b>  |
| Allied <sup>¶</sup> (PAC <sup>†</sup> ) | 155                              | 49.7 | 8.2 | 48.5; 50.8 | -0.8 [-2.8; 1.2]         | 0.948            | 49.3                           | 7.6 | 48.2; 50.4 | -2.4 [-4.4; 0.4]         | 0.010             |
| Educators (PAC <sup>†</sup> )           | 49                               | 51.4 | 5.6 | 49.4; 53.4 | 0.9 [-2.6; 4.4]          | 0.998            | 47.6                           | 7.7 | 44.8; 55.4 | -4.1 [-7.7; 0.5]         | 0.015             |
| Managers (LTC <sup>§</sup> )            | 68                               | 52.7 | 7.0 | 50.1; 55.2 | 2.2 [-0.8; 5.2]          | 0.319            | 51.5                           | 7.2 | 48.9; 54.1 | -0.2 [-3.3; 2.9]         | 1.000             |
| Managers (PAC <sup>†</sup> )            | 22                               | 55.4 | 4.0 | 52.6; 58.2 | 4.9 [-0.3; 10.1]         | 0.080            | 51.1                           | 9.0 | 44.9; 57.4 | -0.6 [-6.0; 4.8]         | 1.000             |

Note: N = number of individuals (may differ from sample size reported in table 2 due to missing data), M = mean, SD = standard deviation, 95% CI = 95% confidence interval, MD = mean difference (mean for healthcare worker group minus mean of normative data)

\*Based on analyses of variance (ANOVA), including Dunnett-adjusted post-hoc comparisons of each care provider group with normative data

<sup>†</sup>PAC = pediatric acute care

<sup>‡</sup>RNs = registered nurses

<sup>§</sup>LTC = long term care

<sup>||</sup>LPNs = licensed practical nurses

<sup>¶</sup>Allied = allied healthcare providers

Confidential

## A. Physical health LTC

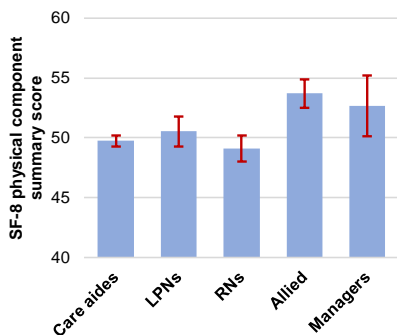

| Reference | Comparison | MD [95% CI]    | P*      |
|-----------|------------|----------------|---------|
| Allied    | Care aides | 4.0 [2.0; 6.0] | <0.0001 |
|           | LPNs       | 3.2 [0.5; 5.9] | 0.010   |
|           | RNs        | 4.6 [2.0; 7.1] | <0.0001 |
| Managers  | Care aides | 3.0 [0.3; 5.7] | 0.020   |
|           | RNs        | 3.6 [0.5; 6.7] | 0.015   |

## B. Mental health LTC

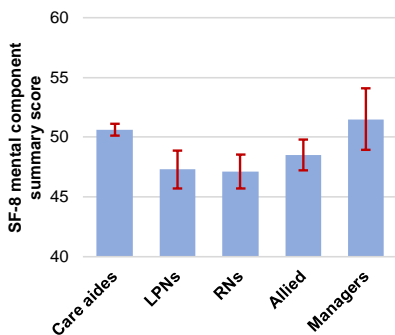

| Reference  | Comparison | MD [95% CI]    | P*      |
|------------|------------|----------------|---------|
| Care aides | LPNs       | 3.3 [1.0; 5.6] | 0.001   |
|            | RNs        | 3.5 [1.4; 5.6] | <0.0001 |
| Managers   | LPNs       | 4.2 [0.5; 7.9] | 0.018   |
|            | RNs        | 4.4 [0.8; 8.0] | 0.008   |

## C. Physical health PAC

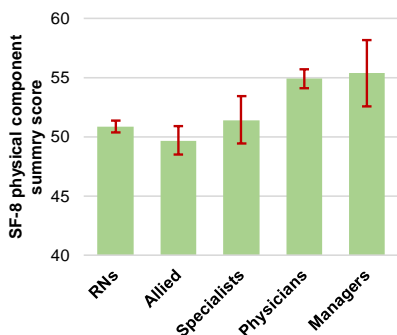

| Reference  | Comparison | MD [95% CI]     | P*      |
|------------|------------|-----------------|---------|
| Physicians | RNs        | 4.0 [1.4; 6.6]  | <0.001  |
|            | Allied     | 5.2 [2.3; 8.1]  | <0.0001 |
| Managers   | RNs        | 4.5 [0.3; 8.7]  | 0.030   |
|            | Allied     | 5.7 [1.3; 10.1] | 0.004   |

## D. Mental health PAC

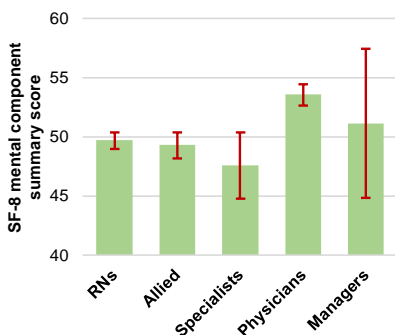

| Reference  | Comparison | MD [95% CI]     | P*      |
|------------|------------|-----------------|---------|
| Physicians | RNs        | 5.7 [2.7; 8.7]  | <0.0001 |
|            | Allied     | 4.3 [0.9; 7.7]  | 0.005   |
|            | Educators  | 6.0 [1.7; 10.3] | 0.001   |

## A. Physical health

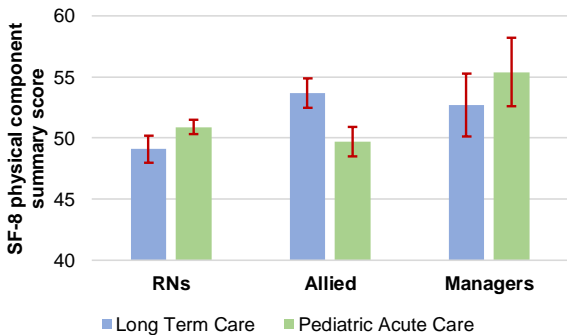

| Group    | MD [95% CI]       | P                 |
|----------|-------------------|-------------------|
| RNs      | -1.8 [-3.3; -0.3] | <b>0.012</b>      |
| Allied   | 4.0 [1.9; 6.1]    | <b>&lt;0.0001</b> |
| Managers | -2.7 [-6.7; 1.3]  | 0.259             |

## B. Mental health

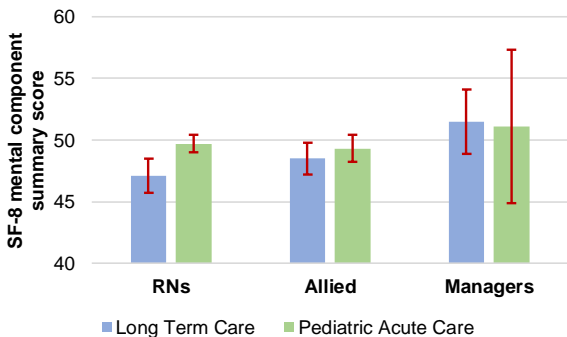

| Group    | MD [95% CI]       | P            |
|----------|-------------------|--------------|
| RNs      | -2.6 [-4.4; -0.8] | <b>0.002</b> |
| Allied   | -0.8 [-3.0; 1.4]  | 0.663        |
| Managers | 0.1 [-5.0; 5.2]   | 1.000        |



STROBE Statement—Checklist of items that should be included in reports of *cross-sectional studies*

|                              | Item No | Recommendation                                                                                                                                                                                    |               |
|------------------------------|---------|---------------------------------------------------------------------------------------------------------------------------------------------------------------------------------------------------|---------------|
| <b>Title and abstract</b>    | 1       | (a) Indicate the study's design with a commonly used term in the title or the abstract                                                                                                            | ✓<br>(p. 1)   |
|                              |         | (b) Provide in the abstract an informative and balanced summary of what was done and what was found                                                                                               | ✓<br>(p. 2)   |
| <b>Introduction</b>          |         |                                                                                                                                                                                                   |               |
| Background/rationale         | 2       | Explain the scientific background and rationale for the investigation being reported                                                                                                              | ✓<br>(p. 3-4) |
| Objectives                   | 3       | State specific objectives, including any prespecified hypotheses                                                                                                                                  | ✓<br>(p. 3-4) |
| <b>Methods</b>               |         |                                                                                                                                                                                                   |               |
| Study design                 | 4       | Present key elements of study design early in the paper                                                                                                                                           | ✓<br>(p. 4)   |
| Setting                      | 5       | Describe the setting, locations, and relevant dates, including periods of recruitment, exposure, follow-up, and data collection                                                                   | ✓<br>(p. 4)   |
| Participants                 | 6       | (a) Give the eligibility criteria, and the sources and methods of selection of participants                                                                                                       | ✓<br>(p. 4)   |
| Variables                    | 7       | Clearly define all outcomes, exposures, predictors, potential confounders, and effect modifiers. Give diagnostic criteria, if applicable                                                          | ✓<br>(p. 4-5) |
| Data sources/<br>measurement | 8*      | For each variable of interest, give sources of data and details of methods of assessment (measurement). Describe comparability of assessment methods if there is more than one group              | ✓<br>(p. 4-5) |
| Bias                         | 9       | Describe any efforts to address potential sources of bias                                                                                                                                         | ✓<br>(p. 4-5) |
| Study size                   | 10      | Explain how the study size was arrived at                                                                                                                                                         | ✓<br>(p. 4-5) |
| Quantitative variables       | 11      | Explain how quantitative variables were handled in the analyses. If applicable, describe which groupings were chosen and why                                                                      | ✓<br>(p. 5-6) |
| Statistical methods          | 12      | (a) Describe all statistical methods, including those used to control for confounding                                                                                                             | ✓<br>(p. 5-6) |
|                              |         | (b) Describe any methods used to examine subgroups and interactions                                                                                                                               | ✓<br>(p. 5-6) |
|                              |         | (c) Explain how missing data were addressed                                                                                                                                                       | ✓<br>(p. 5-6) |
|                              |         | (d) If applicable, describe analytical methods taking account of sampling strategy                                                                                                                | NA            |
|                              |         | (e) Describe any sensitivity analyses                                                                                                                                                             | NA            |
| <b>Results</b>               |         |                                                                                                                                                                                                   |               |
| Participants                 | 13*     | (a) Report numbers of individuals at each stage of study—eg numbers potentially eligible, examined for eligibility, confirmed eligible, included in the study, completing follow-up, and analysed | ✓<br>(p. 6)   |
|                              |         | (b) Give reasons for non-participation at each stage                                                                                                                                              | NA            |
|                              |         | (c) Consider use of a flow diagram                                                                                                                                                                | NA            |
| Descriptive data             | 14*     | (a) Give characteristics of study participants (eg demographic, clinical, social) and information on exposures and potential confounders                                                          | ✓<br>(p. 6)   |

|                          |     |                                                                                                                                                                                                              |                |
|--------------------------|-----|--------------------------------------------------------------------------------------------------------------------------------------------------------------------------------------------------------------|----------------|
|                          |     | (b) Indicate number of participants with missing data for each variable of interest                                                                                                                          | ✓<br>(p. 6-7)  |
| Outcome data             | 15* | Report numbers of outcome events or summary measures                                                                                                                                                         | ✓<br>(p. 6-8)  |
| Main results             | 16  | (a) Give unadjusted estimates and, if applicable, confounder-adjusted estimates and their precision (eg, 95% confidence interval). Make clear which confounders were adjusted for and why they were included | ✓<br>(p. 6-8)  |
|                          |     | (b) Report category boundaries when continuous variables were categorized                                                                                                                                    | NA             |
|                          |     | (c) If relevant, consider translating estimates of relative risk into absolute risk for a meaningful time period                                                                                             | NA             |
| Other analyses           | 17  | Report other analyses done—eg analyses of subgroups and interactions, and sensitivity analyses                                                                                                               | NA             |
| <b>Discussion</b>        |     |                                                                                                                                                                                                              |                |
| Key results              | 18  | Summarise key results with reference to study objectives                                                                                                                                                     | ✓<br>(p. 8)    |
| Limitations              | 19  | Discuss limitations of the study, taking into account sources of potential bias or imprecision. Discuss both direction and magnitude of any potential bias                                                   | ✓<br>(p. 10)   |
| Interpretation           | 20  | Give a cautious overall interpretation of results considering objectives, limitations, multiplicity of analyses, results from similar studies, and other relevant evidence                                   | ✓<br>(p. 8-10) |
| Generalisability         | 21  | Discuss the generalisability (external validity) of the study results                                                                                                                                        | ✓<br>(p. 8-10) |
| <b>Other information</b> |     |                                                                                                                                                                                                              |                |
| Funding                  | 22  | Give the source of funding and the role of the funders for the present study and, if applicable, for the original study on which the present article is based                                                | ✓<br>(p. 1)    |

\*Give information separately for exposed and unexposed groups.

**Note:** An Explanation and Elaboration article discusses each checklist item and gives methodological background and published examples of transparent reporting. The STROBE checklist is best used in conjunction with this article (freely available on the Web sites of PLoS Medicine at <http://www.plosmedicine.org/>, Annals of Internal Medicine at <http://www.annals.org/>, and Epidemiology at <http://www.epidem.com/>). Information on the STROBE Initiative is available at [www.strobe-statement.org](http://www.strobe-statement.org).
